1 ***N*<sup>6</sup>-methyladenosine (m<sup>6</sup>A) and reader protein YTHDF2 enhance innate**  
2 **immune response by mediating DUSP1 mRNA degradation and**  
3 **activating mitogen-activated protein kinases during bacterial and viral**  
4 **infections**

5

6 Jian Feng,<sup>a,b</sup> Wen Meng,<sup>a,b</sup> Luping Chen,<sup>a,b</sup> Xinquan Zhang,<sup>a,b</sup> Ashley  
7 Markazi,<sup>a,b</sup> Weiming Yuan,<sup>c</sup> Yufei Huang,<sup>a,d,e,f</sup> Shou-Jiang Gao<sup>a,b</sup>

8

9 <sup>a</sup>Cancer Virology Program, UPMC Hillman Cancer Center, University of  
10 Pittsburgh, Pittsburgh, PA, USA

11 <sup>b</sup>Department of Microbiology and Molecular Genetics, University of Pittsburgh,  
12 Pittsburgh, PA, USA

13 <sup>c</sup>Department of Molecular Microbiology and Immunology, Keck School of  
14 Medicine, University of Southern California School of Medicine, Los Angeles,  
15 CA, USA

16 <sup>d</sup>Department of Electrical and Computer Engineering, University of Pittsburgh,  
17 Pittsburgh, PA, USA

18 <sup>e</sup>Department of Biomedical Informatics, University of Pittsburgh, Pittsburgh, PA,  
19 USA

20 <sup>f</sup>Department of Medicine, University of Pittsburgh, Pittsburgh, PA, USA

21 Address correspondence to Shou-Jiang Gao, [gaos8@upmc.edu](mailto:gaos8@upmc.edu).

22 The authors declare no conflict of interest.

23 **Abstract**

24 Mitogen-activated protein kinases (MAPKs) play critical roles in the  
25 induction of numerous cytokines, chemokines, and inflammatory mediators  
26 that mobilize the immune system to counter pathogenic infections.  
27 Dual-specificity phosphatase-1 (DUSP1) is a member of dual-specificity  
28 phosphatases, which inactivates MAPKs through a negative feedback  
29 mechanism. Here we report that in response to viral and bacterial infections,  
30 not only DUSP1 transcript but also its  $N^6$ -methyladenosine ( $m^6A$ ) level rapidly  
31 increase together with the  $m^6A$  reader protein YTHDF2, resulting in enhanced  
32 YTHDF2-mediated DUSP1 transcript degradation. Knockdown of DUSP1  
33 promotes p38 and JNK phosphorylation and activation, thus increasing the  
34 expression of innate immune response genes including IL1 $\beta$ , CSF3, TGM2  
35 and SRC. Similarly, knockdown of  $m^6A$  eraser ALKBH5 increases DUSP1  
36 transcript  $m^6A$  level resulting in accelerated transcript degradation, activation  
37 of p38 and JNK, and enhanced expression of IL1 $\beta$ , CSF3, TGM2 and SRC.  
38 These results demonstrate that  $m^6A$  and reader protein YTHDF2 orchestrate  
39 optimal innate immune response during viral and bacterial infections by  
40 downregulating the expression of a negative regulator DUSP1 of the p38 and  
41 JNK pathways that are central to innate immune response against pathogenic  
42 infections.

43 **IMPORTANCE**

44           Innate immunity is central for controlling pathogenic infections and  
45 maintaining the homeostasis of the host. In this study, we have revealed a  
46 novel mechanism regulating innate immune response during viral and bacterial  
47 infections. We have found that  $N^6$ -methyladenosine ( $m^6A$ ) and the reader  
48 protein YTHDF2 regulate dual-specificity phosphatase-1, a negative regulator  
49 of mitogen-activated protein kinases p38 and JNK, to maximize innate immune  
50 response during viral and bacterial infections. These results provide novel  
51 insights into the mechanism regulating innate immunity, which could help the  
52 development of novel approaches for controlling pathogenic infections.

53

54 **KEYWORDS:**  $N^6$ -methyladenosine,  $m^6A$ ; YTHDF2; Innate immunity;  
55 dual-specificity phosphatase-1, DUSP1; mitogen-activated protein kinases,  
56 MAPKs; p38; JNK

## 57 **Introduction**

58           The innate immune system is a highly efficient cellular and molecular  
59 network in mammalian cells that protects the organism against pathogenic  
60 infections (1). This first line of defense against invasion is achieved by sensing  
61 the pathogens through pattern recognition receptors (2). Stimulation of pattern  
62 recognition receptors on the cell surface and in the cytoplasm of innate  
63 immune cells activates multiple mitogen-activated protein kinases (MAPKs)  
64 including the extracellular signal-regulated kinase (ERK), p38 and Jun  
65 N-terminal kinase (JNK) (3). MAPKs are a group of highly conserved  
66 serine/threonine protein kinases in eukaryotes (4), which play a critical role in  
67 inducing numerous cytokines, chemokines, and inflammatory mediators that  
68 mobilize the immune system to counter pathogenic infections (5). Furthermore,  
69 the induction of pro-inflammatory response promotes the recruitment of  
70 additional immune cells to invoke secondary innate and adaptive immune  
71 responses (6).

72           Dual-specificity phosphatase-1 (DUSP1, also known as MAPK  
73 phosphatase-1 or MKP-1) was initially identified in cultured murine cells (7). It  
74 is a member of dual-specificity phosphatases (DUSPs), which are key players  
75 for inactivating different MAPKs (8). DUSP1 expression is enhanced upon  
76 numerous pathogenic infections, and it is an important feedback mechanism  
77 for controlling excessive immune response and inflammation (9, 10). By  
78 dephosphorylation, DUSP1 inhibits the activation of specific threonine and



79 tyrosine residues on p38 and JNK, resulting in inactivation of inflammatory or  
80 innate immune response through inhibiting the expression of numerous  
81 effector genes at transcriptional or post-transcriptional levels (11).

82 *N*6-methyladenosine (m<sup>6</sup>A), a dynamic posttranscriptional RNA  
83 modification, is critical for almost all aspects of RNA metabolism and functions  
84 including structure, maturation, stability, splicing, export, translation, and decay  
85 (12). Recent studies show that m<sup>6</sup>A modification not only directly regulates the  
86 expression of innate immune response genes, but also indirectly affects the  
87 mRNA metabolism pathway to further regulate the innate immune response  
88 during bacterial and viral infections (13-16) .

89 We have previously shown that m<sup>6</sup>A plays an important role in  
90 regulating innate immune response against both bacterial and viral infections  
91 by directly and indirectly regulating the expression of innate immune response  
92 genes (13). More recent works indicate m<sup>6</sup>A is a vital factor for regulating  
93 innate immune response and cytokines by affecting the IKK $\epsilon$ /TBK1/IRF3,  
94 MAPK and NF- $\kappa$ B pathways (17, 18). In this study, we have discovered that  
95 DUSP1 is a direct m<sup>6</sup>A target, and m<sup>6</sup>A and the reader protein YTHDF2  
96 regulate DUSP1 stability to maximize innate immune response during bacterial  
97 and viral infections.

98

## 99 **Results**

100 **m<sup>6</sup>A mediates DUSP1 transcript expression during bacterial**

101 **infection.** We have previously mapped the cellular expression profiles and  
102 m<sup>6</sup>A epitranscriptomes, and identified a set of genes including innate immune  
103 response genes that are differentially methylated and differentially expressed  
104 during viral and bacterial infections (13). Among them, DUSP1, an important  
105 regulator of innate immune response genes, was significantly  
106 hyper-methylated during gram-negative bacteria *Pseudomonas aeruginosa*  
107 infection, which peaked at 2 h post-infection (hpi), then decreased at 4 and 6  
108 hpi (Fig. 1A). At the same time, DUSP1 transcript expression was upregulated  
109 which also peaked at 2 hpi, then decreased at 4 and 6 hpi (Fig. 1B). These  
110 results were consistent with the induction of DUSP1 by LPS or TLR ligands  
111 reported in previous studies (19, 20).

112 We confirmed the increase of DUSP1 transcript m<sup>6</sup>A during *P.*  
113 *aeruginosa* infection by m<sup>6</sup>A-immunoprecipitation reverse transcription  
114 quantitative real time PCR (MeRIP-qPCR). The DUSP1 transcript m<sup>6</sup>A level  
115 was increased by 2.3-fold at 2 hpi of *P. aeruginosa* but then decreased at 4  
116 and 6 hpi (Fig. 1C). Reverse transcription quantitative real time PCR  
117 (RT-qPCR) further confirmed the increased DUSP1 transcript expression  
118 following *P. aeruginosa* infection, which peaked at 2 hpi (Fig. 1D).

119 We then performed knockdown of ALKBH5, an m<sup>6</sup>A “eraser”, to  
120 determine whether the increase of DUSP1 transcript m<sup>6</sup>A could affect its  
121 expression (Fig. 1E). As expected, ALKBH5 knockdown further increased the  
122 m<sup>6</sup>A level of DUSP1 transcript by 2.5- to 2.8-fold (Fig. 1F). However, DUSP1

123 transcript expression was reduced by 25% to 40% (Fig. 1G), which was also  
124 reflected in the decreased DUSP1 protein level (Fig. 1E). These results  
125 suggest that the increased m<sup>6</sup>A level during *P. aeruginosa* infection likely  
126 serves to reverse the upregulation of DUSP1 transcript. Since one of the  
127 functions of m<sup>6</sup>A modification is to mediate RNA decay (21, 22), we examined  
128 DUSP1 transcript stability during *P. aeruginosa* infection. The half-life of  
129 DUSP1 transcript was reduced by 12.7% to 37.1% following ALKBH5  
130 knockdown (Fig. 1H), indicating m<sup>6</sup>A regulation of DUSP1 RNA decay during *P.*  
131 *aeruginosa* infection.

132

### 133 **YTHDF2 mediates m<sup>6</sup>A-dependent DUSP1 transcript degradation.**

134 In order to further delineate the role of m<sup>6</sup>A in innate immune response, we  
135 infected mouse RAW264.7 macrophage cells with different doses of  
136 gram-negative or -positive bacteria or human simplex virus type 1 (HSV-1),  
137 and examined the expression of innate immune response genes (Fig. S1).  
138 Infection with 10<sup>7</sup> gram-positive bacteria *Corynebacterium diphtheriae*, 10<sup>7</sup> *P.*  
139 *aeruginosa* or 1 multiplicity of infection (MOI) of HSV-1 induced maximum  
140 expression of innate immune response genes including colony stimulating  
141 factor 3 (CSF3), interleukin-1 $\beta$  (IL1 $\beta$ ), transglutaminase 2 (TGM2),  
142 proto-oncogene tyrosine-protein kinase Src (SRC) under our experimental  
143 conditions (Fig. S1). Thus, we used these conditions in subsequent  
144 experiments.

145 We examined the protein levels of m<sup>6</sup>A “writers”, “erasers” and “readers”  
146 during bacterial and viral infections (Fig. 2A). The m<sup>6</sup>A “writer” protein  
147 METTL14 had marginal increases during *P. aeruginosa*, *C. diphtheriae* and  
148 wild-type (WT) HSV-1 infections while another m<sup>6</sup>A “writer” protein METTL3  
149 had marginal increases during *P. aeruginosa* and *C. diphtheriae* infections (Fig.  
150 2A). The eraser protein ALKBH5 also had slight increase during *C. diphtheriae*  
151 infection. Of the reader proteins examined, YTHDF1 had marginal increase  
152 during *C. diphtheriae* infection. However, YTHDF2 had significant increases  
153 during *C. diphtheriae* and *P. aeruginosa* infections by 3.89- and 4.21-fold,  
154 respectively, at 8 hpi (Fig. 2A). Since YTHDF2 mediates m<sup>6</sup>A-dependent RNA  
155 decay (23), we performed knockdown of YTHDF2 (Fig. 2B), and observed an  
156 upregulation of the DUSP1 transcript (Fig. 2C), which was also reflected in an  
157 increase of DUSP1 protein level (Fig. 2B). Knockdown of YTHDF2 almost  
158 doubled the half-life of DUSP1 transcript (Fig. 2D). Furthermore, YTHDF2 RNA  
159 immunoprecipitation reverse transcription quantitative real time PCR  
160 (RIP-qPCR) showed the binding of YTHDF2 protein to the DUSP1 RNA  
161 transcript, which was significantly increased at 4 and 6 hpi (Fig. 2E),  
162 correlating with the increased YTHDF2 protein level at these time points (Fig.  
163 2A). Together, these results indicate that the upregulation of YTHDF2 protein  
164 promotes the degradation of DUSP1 transcript during *P. aeruginosa* infection.

165

166 **DUSP1 regulates p38 and JNK phosphorylation during bacterial**

167 **and viral infections.** As an important innate immune response gene, DUSP1  
168 inactivates MAPKs by inhibiting their phosphorylation (11). Our results showed  
169 upregulation of DUSP1 transcript during bacterial and viral infections, which  
170 was reversed by m<sup>6</sup>A- and YTHDF2-mediated transcript degradation (Fig. 1  
171 and 2). As expected, ERK, p38 and JNK MAPKs were activated at 2 hpi by *P.*  
172 *aeruginosa*, *C. diphtheriae*, and HSV-1 WT and ICP34.5 mutant viruses (Fig.  
173 3A). We included the HSV-1 ICP34.5 mutant virus because the ICP34.5  
174 protein has been shown to prevent the induction of innate immune genes  
175 during HSV-1 infection by directly inhibiting TBK1 activation and eIF2a function  
176 (24, 25). To determine whether DUSP1 regulated the activation of MAPKs  
177 during bacterial and viral infections, we performed DUSP1 knockdown.  
178 Western-blotting results showed that the levels of phosphorylated p38 and  
179 JNK (p-p38 and p-JNK) were increased following DUSP1 knockdown during  
180 bacterial and viral infections (Fig. 3A). Activation of MAPKs can induce their  
181 downstream transcriptional factors including AP-1 and C/EBP, resulting in  
182 upregulation of target genes including numerous innate immune response  
183 genes (26). Consistent with the increased levels of p-p38 and p-JNK following  
184 DUSP1 knockdown, the levels of CSF3, IL1 $\beta$ , TGM2 and SRC transcripts were  
185 upregulated (Fig. 3B). We observed some variations of the effects of different  
186 DUSP1 siRNAs on the expression of IL1 $\beta$ , CSF3, TGM2 and SRC transcripts.  
187 These might be due to the different knockdown kinetics of these siRNAs. The  
188 IL1 $\beta$  protein level was also upregulated after DUSP1 knockdown during

189 infections by *P. aeruginosa*, *C. diphtheriae*, and HSV-1 ICP34.5 mutant virus  
190 (Fig. 3C). However, upregulation of the IL1 $\beta$  protein was weak during WT  
191 HSV-1 infection and its increase was only marginal after DUSP1 knockdown  
192 (Fig. S2A), which was likely due to the inhibition of innate immune response by  
193 the HSV-1 ICP34.5 protein (24, 25). These results indicated that DUSP1  
194 inhibited p-p38 and p-JNK activation to block innate immune response during  
195 bacterial and viral infections.

196

197 **ALKBH5 regulates p38 and JNK phosphorylation, and their**  
198 **downstream innate immune response genes during bacterial and viral**  
199 **infections.** Since DUSP1 inactivated the p38 and JNK during bacterial and  
200 viral infections, and ALKBH5 knockdown reduced DUSP1 transcript stability by  
201 increasing m<sup>6</sup>A level, we examined ALKBH5 regulation of p38 and JNK  
202 activation. ALKBH5 knockdown increased the levels of p-p38 and p-JNK  
203 during infection by *P. aeruginosa*, *C. diphtheriae*, or HSV-1 WT or ICP34.5  
204 mutant virus (Fig. 4A-4D). Some minor increase of p-ERK was also observed  
205 at 2 hpi of *C. diphtheriae*. Since the increased p-p38 and p-JNK levels could  
206 lead to enhanced activation of their downstream transcriptional factors, we  
207 examined *de novo* transcription of the target genes by performing nuclear  
208 run-on assay during *P. aeruginosa* infection. ALKBH5 knockdown indeed  
209 increased the transcriptional activities of IL1 $\beta$ , CSF3, TGM2 and SRC genes  
210 (Fig. 4E).

211 We further examined the role of ALKBH5 on the expression of innate  
212 immune response genes. ALKBH5 knockdown increased the levels of IL1 $\beta$ ,  
213 CSF3, TGM2 and SRC transcripts during infection by *P. aeruginosa*, *C.*  
214 *diphtheriae*, or HSV-1 WT or ICP34.5 mutant virus (Fig. 5A). Similar to DUSP1  
215 knockdown, we noticed variations of the effects of different ALKBH5 siRNAs  
216 on both the transcription and expression of IL1 $\beta$ , CSF3, TGM2 and SRC genes  
217 (Fig. 4E and 5). These might be due to the different knockdown kinetics of  
218 these siRNAs, which might impact the m<sup>6</sup>A level of DUSP1 transcript, DUSP1  
219 expression level, and p-p38 and p-JNK levels, leading to variable transcription  
220 and expression levels of these downstream genes.

221 The protein level of IL1 $\beta$  was also upregulated after ALKBH5  
222 knockdown during infections by *P. aeruginosa*, *C. diphtheriae*, and HSV-1  
223 ICP34.5 mutant virus (Fig. 5B-5D). However, the upregulation of IL1 $\beta$  protein  
224 was marginal during WT HSV-1 infection (Fig. S2B). In contrast,  
225 overexpression of ALKBH5 reduced the levels of IL1 $\beta$ , CSF3, TGM2 and SRC  
226 transcripts (Fig. 5E), and downregulated the IL1 $\beta$  protein level (Fig. 5F) during  
227 *P. aeruginosa* infection. It was interesting that the reduced expression of the  
228 four transcripts had different kinetics following overexpression of ALKBH5 (Fig.  
229 5E). The effect of ALKBH5 overexpression was observed for TGM2 and SRC  
230 transcripts at as early as 2 hpi, which disappeared by 6 hpi. However, the  
231 effect was not observed for CSF3 until 4 hpi and for IL1 $\beta$  until 6 hpi. It is  
232 possible that the promoters of these genes might endow them with different

233 kinetics in response to the activation of p38 and JNK pathways.

234           Because our results showed an important role of ALKBH5 in regulating  
235 innate immune response, we further examined the impact of ALKBH5  
236 knockdown on HSV-1 replication. ALKBH5 knockdown reduced the replication  
237 of HSV-1 WT or ICP34.5 mutant virus (Fig. S3). These results are in  
238 agreement with those of a previous study showing reduced HSV-1 replication  
239 after ALKBH5 knockout (14).

240           In conclusion, bacterial and viral infections activate MAPKs to induce  
241 innate immune response genes as well as a negative regulator of MAPKs,  
242 DUSP1, to avoid excessive innate immune response. At the same time,  
243 numerous m<sup>6</sup>A writer proteins and reader protein YTHDF2 are induced,  
244 leading to hyper-methylation of DUSP1 transcript, which is targeted for  
245 YTHDF2-mediated degradation. This mechanism of fine-tuned activation of  
246 MAPKs optimizes the induction of innate immune response genes during  
247 pathogenic infections (Fig. 6).

248

## 249 **Discussion**

250           The innate immune system is a complex cellular and molecular network  
251 in mammalian cells that serves as the first line of defense against pathogenic  
252 infections and is regulated by diverse cellular pathways (1). DUSP1 is a critical  
253 regulator of MAPK pathways serving as a negative feedback mechanism to  
254 prevent excessive activation of these pathways (27, 28). In the context of



255 pathogenic infections, activation of MAPKs induces the expression of innate  
256 immune response genes as well as DUSP1, which prevents overreactive  
257 immune response (29-31). Our results showed that DUSP1 transcript was  
258 indeed induced during bacterial and viral infections together with the activation  
259 of the ERK, JNK and p38 MAPK pathways. At the same time, the m<sup>6</sup>A level of  
260 DUSP1 transcript was significantly increased. During these processes, we only  
261 observed marginal increases of m<sup>6</sup>A writer proteins METTL3 and METTL14  
262 and no decrease of m<sup>6</sup>A eraser proteins ALKBH5 and FTO, suggesting that the  
263 observed m<sup>6</sup>A increase in the DUSP1 transcript likely depended on preexisting  
264 writer proteins. Interestingly, despite the increased expression of DUSP1  
265 transcript during bacterial and viral infections, we failed to detect an increase  
266 of DUSP1 protein. It is unclear whether the increased DUSP1 transcript m<sup>6</sup>A  
267 might affect its translation. In addition, it is unclear why the m<sup>6</sup>A level is only  
268 increased in some *de novo* transcribed transcripts but not others. The specific  
269 mechanism involved in this selection process might deserve further  
270 investigations. Nevertheless, the results of ALKBH5 knockdown experiments  
271 revealed that the m<sup>6</sup>A increase in the DUSP1 transcript targeted it for  
272 YTHDF2-mediated degradation. Importantly, YTHDF2 was significantly  
273 induced during bacterial infections, which maximized its negative regulation of  
274 DUSP1 transcript stability. Taken together, these results suggest that m<sup>6</sup>A and  
275 YTHDF2 are involved in fine-tuning the expression of DUSP1 protein, an  
276 important regulator of innate immunity, during pathogenic infections.

277           The observed induction of YTHDF2 protein is consistent with results  
278 from another study showing LPS induction of YTHDF2 expression (32).  
279 Interestingly, there was no obvious change of YTHDF2 protein following HSV-1  
280 infection, indicating possible involvement of the bacteria-associated pattern  
281 recognition receptors in the induction of YTHDF2 protein. However, it is  
282 possible that HSV-1 infection might have a YTHDF2 induction kinetic that is  
283 different from those of bacterial infections. Alternatively, HSV-1 might have  
284 evolved to prevent YTHDF2 induction as a mechanism to counter innate  
285 immune response.

286           Our results showed that m<sup>6</sup>A- and YTHDF2-mediated degradation of  
287 DUSP1 transcript resulted in enhanced activation of p38 and JNK. Both p38  
288 and JNK pathways activate transcriptional factors such AP-1 and C/EBP that  
289 are essential for the expression of innate immune response genes. Indeed,  
290 knockdown DUSP1 or m<sup>6</sup>A eraser ALKBH5 enhanced the expression of innate  
291 immune response genes including IL1 $\beta$ , CSF3, TGM2 and SRC during  
292 bacterial or viral infections. We observed robust induction of the IL1 $\beta$  precursor  
293 by HSV-1 ICP34.5 mutant but not WT virus (Fig. S2). It has been reported that  
294 the ICP34.5 protein can directly inhibit TBK1 and eIF2a proteins to prevent the  
295 induction of innate immune genes during HSV-1 infection (24, 25). Interestingly,  
296 activated MAPK pathways can promote HSV-1 viral replication by activating  
297 downstream transcriptional factors (33, 34). However, we showed that  
298 ALKBH5 knockdown inhibited HSV-1 replication, which was likely due to

299 m<sup>6</sup>A-mediated downregulation of DUSP1 and subsequent activation of MAPK  
300 pathways resulting in the induction of innate immune response. However, it is  
301 also possible that ALKBH5 and m<sup>6</sup>A might regulate HSV-1 replication through  
302 another mechanism in addition to targeting DUSP1 transcript for degradation  
303 and activating MAPK pathways.

304 We have previously shown that a set of innate immune response genes  
305 are subjected to m<sup>6</sup>A modification and might be directly regulated by m<sup>6</sup>A while  
306 another set of innate immune response genes might be indirectly regulated by  
307 m<sup>6</sup>A during bacterial and viral infections (13). In the current work, we have  
308 provided an example of m<sup>6</sup>A and YTHDF2 indirect regulation of innate immune  
309 response genes by mediating the stability of DUSP1 transcript. In fact, DUSP1  
310 is under the tight control of m<sup>6</sup>A and YTHDF2 during bacterial and viral  
311 infections. It can be speculated that other DUSP genes, which are involved in  
312 diverse cellular functions, could also be regulated by m<sup>6</sup>A and m<sup>6</sup>A-related  
313 proteins, and therefore deserve further investigations.

314

## 315 **Material and methods**

316 **Bacteria, viruses, and cells.** *P. aeruginosa* and *C. diphtheriae* were  
317 purchased from ATCC. Herpes simplex virus type 1 (HSV-1) F strain and  
318 HSV-1 ICP34.5 mutant virus were obtained from Dr. Bernard Roizman (The  
319 University of Chicago, Chicago, IL). The ICP34.5 mutant virus (R3616) was  
320 generated by deleting the 1 kb fragment containing both copies of the gamma

321 34.5 gene between the BstEII and Stu I sites from the F strain HSV-1 genome  
322 (35). RAW 264.7 cells were purchased from ATCC and cultured following the  
323 instructions of the vendor.

324

325 **Bacteria and virus infection.** RAW 264.7 cells at  $4 \times 10^5$  cells per mL  
326 were infected with *P. aeruginosa* or *C. diphtheriae* at  $10^7$  per mL, or with HSV-1  
327 WT or ICP34.5 mutant virus at 1 MOI. Cells were harvested at the indicated  
328 time points.

329

330 **m<sup>6</sup>A-immunoprecipitation (m<sup>6</sup>A-IP).** Isolation of m<sup>6</sup>A-containing  
331 fragments was performed as previously described (13, 36). Briefly, total RNA  
332 was extracted from cells using TRI Reagent (T9424-200ML, Sigma-Aldrich)  
333 and fragmented using RNA fragmentation kit (AM8740, ThermoFisher).  
334 Successful fragmentation of RNA with sizes close to 100 nucleotides was  
335 validated using bioanalyzer (2100 Bioanalyzer Instrument, Agilent). Anti-m<sup>6</sup>A  
336 antibody (10 µg) (202-003, Synaptic Systems) was incubated with 30 µl slurry  
337 of Pierce Protein A Agarose beads (20365, ThermoFisher) by rotating in 250 µl  
338 PBS at 4 °C for 3 h. The beads were washed three times in cold PBS followed  
339 by one wash in IP buffer containing 10 mM Tris-HCl at pH 7.4, 150 mM NaCl,  
340 and 1% Igepal CA-630 (I8896-50ML, Sigma-Aldrich). To isolate the  
341 m<sup>6</sup>A-containing fragments, 120 µg of fragmented total RNA was added to the  
342 antibody-bound beads in 250 µl IP buffer supplemented with RNasin Plus

343 RNase inhibitor (PRN2615, Promega), and the mixture was incubated at 4 °C  
344 for 2 h. The beads were washed seven times with 1 ml IP buffer and eluted  
345 with 100 µl IP buffer supplemented with 6.67 mM of m<sup>6</sup>A salt (M2780,  
346 Sigma-Aldrich) at 4 °C for 1 h. A second elution was carried out and the  
347 eluates were pooled together before purification by ethanol 70% precipitation.

348

349 **siRNA knockdown.** siRNA silencing was performed by transfecting 2.5  
350 pmol of each siRNA per well in a 12-well plate into the RAW264.7 cells using  
351 Lipofectamine RNAi Max (13778150, ThermoFisher) according to  
352 manufacturer's instructions. Two days after transfection, the cells were  
353 monitored for knockdown efficiency of the target gene by RT-qPCR and  
354 Western-blotting. siRNAs purchased from Sigma-Aldrich are as follows:  
355 DUSP1 si1: SASI\_Mm02\_00322441; DUSP1 si2: SASI\_Mm01\_00056586;  
356 DUSP1 si3: SASI\_Mm01\_00056587; ALKBH5 si1: SASI\_Mm01\_00106232;  
357 ALKBH5 si2: SASI\_Mm02\_00344968; ALKBH5 si3: SASI\_Mm01\_00106233;  
358 and siNegative Control (NC): Sigma siRNA Universal Negative Control #1  
359 (SIC001-10NMOL).

360

361 **RNA stability assay.** Actinomycin D (10 µg/ml) (A9415-2MG,  
362 Sigma-Aldrich) was added to cells to inhibit transcription. RNA was isolated at  
363 0, 2, 4 and 6 h after actinomycin D treatment using Trizol and the transcripts  
364 were quantified by RT-qPCR.

365

366 **RT-qPCR for gene expression, RIP-qPCR for YTHDF2 RNA binding**

367 **quantification and MeRIP-qPCR for m<sup>6</sup>A-seq validation.** Total RNA was  
368 isolated with TRI Reagent (T9424-200ML, Sigma-Aldrich) according to the  
369 manufacturer's instructions. Reverse transcription was performed with 1 µg of  
370 total RNA using Maxima H Minus First Strand cDNA Synthesis Kit (Cat.#  
371 K1652, ThermoFisher). Quantitative PCR was done using SsoAdvanced  
372 Universal SYBR Green Supermix (1725271, Bio-Rad). Relative gene  
373 expression levels were obtained by normalizing the cycle threshold (CT)  
374 values to yield  $2^{-\Delta\Delta Ct}$  values. For validation of m<sup>6</sup>A-seq, eluted or input mRNA  
375 was subjected to RT-qPCR. Fold enrichment was obtained by calculating the  
376  $2^{-\Delta Ct}$  value of eluate in relative to the input sample. The primers used for gene  
377 expression are:

378 5'CTGGTGGGTGTGTCAAGCAT3' (forward) and

379 5'GAGGCAGTTTCTTCGCTTGC3' (reverse) for DUSP1; and

380 5'CCCTGAAGTACCCATTGAA3' (forward) and

381 5'GGGGTGTGGAAGGTCTCAA3' (reverse) for β-actin; and

382 5'GAGTGTGGATCCCAAGCAAT3' (forward) and

383 5'ACGGATTCCATGGTGAAGTC3' (reverse) for IL1β; and

384 5'CCGGTACCCTCTCCTGTTGTGTTTA3' (forward) and

385 5'AACTCGAGCTAAAAAGGAGGACGGC3' (reverse) for CSF3; and

386 5'AAGAGCTCCAACAAGGTCTGCCTT3' (forward) and

387 5'AACTCGAGACGTGCCATATAAGCAC3' (reverse) for TGM2; and  
388 5'AAGGTACCCTGCCAGGCCAGACCAA3' (forward) and  
389 5'AACTCGAGCCAGCCTTGACCCTGAG3' (reverse) for SRC; and  
390 5'ACGGTTTACTACGCCGTGTT3' (forward) and  
391 5'TGTAGGGTTGTTTCCGGACG3' (reverse) for US6; and  
392 5'GACGAACATGAAGGGCTGGA' (forward) and  
393 5'CGACCTGTTTGA CTGCCTCT3' (reverse) for VP16; and  
394 5'CCCACTATCAGGTACACCAGCTT3' (forward) and  
395 5'CTGCGCTGCGACACCTT3' (reverse) for ICP0; and  
396 5'GCATCCTTCGTGTTTGTCATTCTG3' (forward) and  
397 5'GCATCTTCTCTCCGACCCCG3' (reverse) for ICP27.

398

399 **Western-blotting.** Protein samples were lysed in Laemmli buffer,  
400 separated by SDS-PAGE and transferred to a nitrocellulose membrane (37).  
401 The membrane was blocked with 5% milk and then incubated with primary  
402 antibody to GAPDH (5174s, CST), p38 (8690S, CST), p-p38 (4511S, CST),  
403 ERK (4695S, CST), p-ERK (4370S, CST), JNK (9252S, CST), p-JNK (4668S,  
404 CST), DUSP1 (NBP2-67909, Novus), IL1 $\beta$  (AB-401-NA, R&D system), or  
405 ALKBH5 (HPA007196, Sigma) overnight at 4 °C. The membrane was washed  
406 with TBS-Tween (TBS-T) and probed with a secondary antibody conjugated to  
407 horseradish peroxidase (HRP). After further washing with TBS-T, the blot was  
408 visualized using SuperSignal™ West Femto Maximum Sensitivity Substrate

409 (34096, Thermo) and imaged on a ChemiDoc™ MP Imaging System

410 (12003154, Bio-Rad).

411

412 **Nuclear run-on assay.** Nuclear run-on assay was conducted as

413 previously described (38).

414

415 **RNA immunoprecipitation (RIP) assay.** RIP assay was conducted as

416 previously described (39).

417

#### 418 **SUPPLEMENTAL MATERIAL**

419 Supplemental material is available online only.

420 FIG S1, PDF file, 0.5 MB.

421 FIG S2, PDF file, 1 MB.

422 FIG S3, PDF file, 0.8 MB.

423

#### 424 **ACKNOWLEDGMENTS**

425 This work was supported by grants from the National Institutes of Health

426 (CA096512 and CA124332 to S.-J. Gao), and in part by award P30CA047904.

427 We thank members of Dr. Shou-Jiang Gao's laboratory for technical

428 assistance and helpful discussions.

429 J.F. performed most of the experiments. W.M., L.P.C., X.Q.Z. and A.M.

430 performed a subset of experiments. Y.F.H. performed the bioinformatic



431 analysis. W.Y. provides the HSV-1 wild-type and mutant viruses. J.F. and S.J.G.  
432 prepared the manuscript. S.J.G. planned, managed, and supervised the study,  
433 and secured funding.

434

## 435 REFERENCES

- 436 1. Akira S, Uematsu S, Takeuchi O. 2006. Pathogen recognition and innate  
437 immunity. *Cell* 124:783-801.
- 438 2. Medzhitov R, Janeway C, Jr. 2000. Innate immunity. *N Engl J Med*  
439 343:338-44.
- 440 3. Arthur JS, Ley SC. 2013. Mitogen-activated protein kinases in innate  
441 immunity. *Nat Rev Immunol* 13:679-92.
- 442 4. Nishida E, Gotoh Y. 1993. The MAP kinase cascade is essential for  
443 diverse signal transduction pathways. *Trends Biochem Sci* 18:128-31.
- 444 5. Dong C, Davis RJ, Flavell RA. 2002. MAP kinases in the immune  
445 response. *Annu Rev Immunol* 20:55-72.
- 446 6. Iwasaki A, Medzhitov R. 2010. Regulation of adaptive immunity by the  
447 innate immune system. *Science* 327:291-5.
- 448 7. Charles CH, Ablner AS, Lau LF. 1992. cDNA sequence of a growth  
449 factor-inducible immediate early gene and characterization of its encoded  
450 protein. *Oncogene* 7:187-90.
- 451 8. Theodosiou A, Ashworth A. 2002. MAP kinase phosphatases. *Genome*  
452 *Biol* 3:REVIEWS3009.
- 453 9. Bode JG, Ehlting C, Haussinger D. 2012. The macrophage response  
454 towards LPS and its control through the p38(MAPK)-STAT3 axis. *Cell*  
455 *Signal* 24:1185-94.
- 456 10. Caceres A, Perdiguero B, Gomez CE, Cepeda MV, Caelles C, Sorzano  
457 CO, Esteban M. 2013. Involvement of the cellular phosphatase DUSP1 in  
458 vaccinia virus infection. *PLoS Pathog* 9:e1003719.
- 459 11. Abraham SM, Clark AR. 2006. Dual-specificity phosphatase 1: a critical  
460 regulator of innate immune responses. *Biochem Soc Trans* 34:1018-23.
- 461 12. Tan B, Gao SJ. 2018. The RNA Epitranscriptome of DNA Viruses. *J Virol*  
462 92:e00696-18.
- 463 13. Feng J, Zhang T, Sorel O, Meng W, Zhang X, Lai Z, Yuan W, Chen Y,  
464 Huang Y, Gao SJ. 2022. Global profiling reveals common and distinct  
465 N6-methyladenosine (m6A) regulation of innate immune responses during

- 466 bacterial and viral infections. *Cell Death Dis* 13:234.
- 467 14. Liu Y, You Y, Lu Z, Yang J, Li P, Liu L, Xu H, Niu Y, Cao X. 2019. N  
468 (6)-methyladenosine RNA modification-mediated cellular metabolism  
469 rewiring inhibits viral replication. *Science* 365:1171-1176.
- 470 15. Wang L, Wen M, Cao X. 2019. Nuclear hnRNPA2B1 initiates and amplifies  
471 the innate immune response to DNA viruses. *Science* 365:eaav0758.
- 472 16. Zheng Q, Hou J, Zhou Y, Li Z, Cao X. 2017. The RNA helicase DDX46  
473 inhibits innate immunity by entrapping m(6)A-demethylated antiviral  
474 transcripts in the nucleus. *Nat Immunol* 18:1094-1103.
- 475 17. Jin S, Li M, Chang H, Wang R, Zhang Z, Zhang J, He Y, Ma H. 2022. The  
476 m6A demethylase ALKBH5 promotes tumor progression by inhibiting  
477 RIG-I expression and interferon alpha production through the  
478 IKKepsilon/TBK1/IRF3 pathway in head and neck squamous cell  
479 carcinoma. *Mol Cancer* 21:97.
- 480 18. Zheng Y, Li Y, Ran X, Wang D, Zheng X, Zhang M, Yu B, Sun Y, Wu J.  
481 2022. Mettl14 mediates the inflammatory response of macrophages in  
482 atherosclerosis through the NF-kappaB/IL-6 signaling pathway. *Cell Mol*  
483 *Life Sci* 79:311.
- 484 19. Clark AR, Martins JR, Tchen CR. 2008. Role of dual specificity  
485 phosphatases in biological responses to glucocorticoids. *J Biol Chem*  
486 283:25765-9.
- 487 20. Ichikawa T, Zhang J, Chen K, Liu Y, Schopfer FJ, Baker PR, Freeman BA,  
488 Chen YE, Cui T. 2008. Nitroalkenes suppress lipopolysaccharide-induced  
489 signal transducer and activator of transcription signaling in macrophages:  
490 a critical role of mitogen-activated protein kinase phosphatase 1.  
491 *Endocrinology* 149:4086-94.
- 492 21. Du H, Zhao Y, He J, Zhang Y, Xi H, Liu M, Ma J, Wu L. 2016. YTHDF2  
493 destabilizes m(6)A-containing RNA through direct recruitment of the  
494 CCR4-NOT deadenylase complex. *Nat Commun* 7:12626.
- 495 22. Hsu PJ, Zhu Y, Ma H, Guo Y, Shi X, Liu Y, Qi M, Lu Z, Shi H, Wang J,  
496 Cheng Y, Luo G, Dai Q, Liu M, Guo X, Sha J, Shen B, He C. 2017. Ythdc2  
497 is an N(6)-methyladenosine binding protein that regulates mammalian  
498 spermatogenesis. *Cell Res* 27:1115-1127.
- 499 23. Wang X, Lu Z, Gomez A, Hon GC, Yue Y, Han D, Fu Y, Parisien M, Dai Q,  
500 Jia G, Ren B, Pan T, He C. 2014. N6-methyladenosine-dependent  
501 regulation of messenger RNA stability. *Nature* 505:117-20.
- 502 24. Liu X, Ma Y, Voss K, van Gent M, Chan YK, Gack MU, Gale M, Jr., He B.  
503 2021. The herpesvirus accessory protein gamma134.5 facilitates viral  
504 replication by disabling mitochondrial translocation of RIG-I. *PLoS Pathog*  
505 17:e1009446.

- 506 25. Manivanh R, Mehrbach J, Knipe DM, Leib DA. 2017. Role of Herpes  
507 Simplex Virus 1 gamma34.5 in the Regulation of IRF3 Signaling. *J Virol*  
508 91:e01156-17.
- 509 26. Dainichi T, Matsumoto R, Mostafa A, Kabashima K. 2019. Immune Control  
510 by TRAF6-Mediated Pathways of Epithelial Cells in the EIME (Epithelial  
511 Immune Microenvironment). *Front Immunol* 10:1107.
- 512 27. Gunzl P, Bauer K, Hainzl E, Matt U, Dillinger B, Mahr B, Knapp S, Binder  
513 BR, Schabbauer G. 2010. Anti-inflammatory properties of the PI3K  
514 pathway are mediated by IL-10/DUSP regulation. *J Leukoc Biol*  
515 88:1259-69.
- 516 28. Salojin K, Oravec T. 2007. Regulation of innate immunity by MAPK  
517 dual-specificity phosphatases: knockout models reveal new tricks of old  
518 genes. *J Leukoc Biol* 81:860-9.
- 519 29. Cornell TT, Fleszar A, McHugh W, Blatt NB, Le Vine AM, Shanley TP. 2012.  
520 Mitogen-activated protein kinase phosphatase 2, MKP-2, regulates early  
521 inflammation in acute lung injury. *Am J Physiol Lung Cell Mol Physiol*  
522 303:L251-8.
- 523 30. Valente AJ, Yoshida T, Gardner JD, Somanna N, Delafontaine P,  
524 Chandrasekar B. 2012. Interleukin-17A stimulates cardiac fibroblast  
525 proliferation and migration via negative regulation of the dual-specificity  
526 phosphatase MKP-1/DUSP-1. *Cell Signal* 24:560-568.
- 527 31. Vattakuzhi Y, Abraham SM, Freidin A, Clark AR, Horwood NJ. 2012.  
528 Dual-specificity phosphatase 1-null mice exhibit spontaneous osteolytic  
529 disease and enhanced inflammatory osteolysis in experimental arthritis.  
530 *Arthritis Rheum* 64:2201-10.
- 531 32. Yu R, Li Q, Feng Z, Cai L, Xu Q. 2019. m6A Reader YTHDF2 Regulates  
532 LPS-Induced Inflammatory Response. *Int J Mol Sci* 20:1323.
- 533 33. Perkins D, Pereira EF, Gober M, Yarowsky PJ, Aurelian L. 2002. The  
534 herpes simplex virus type 2 R1 protein kinase (ICP10 PK) blocks  
535 apoptosis in hippocampal neurons, involving activation of the MEK/MAPK  
536 survival pathway. *J Virol* 76:1435-49.
- 537 34. Smith CC, Nelson J, Aurelian L, Gober M, Goswami BB. 2000. Ras-GAP  
538 binding and phosphorylation by herpes simplex virus type 2 RR1 PK  
539 (ICP10) and activation of the Ras/MEK/MAPK mitogenic pathway are  
540 required for timely onset of virus growth. *J Virol* 74:10417-29.
- 541 35. Chou J, Roizman B. 1994. Herpes simplex virus 1 gamma(1)34.5 gene  
542 function, which blocks the host response to infection, maps in the  
543 homologous domain of the genes expressed during growth arrest and  
544 DNA damage. *Proc Natl Acad Sci U S A* 91:5247-51.
- 545 36. Tan B, Liu H, Zhang S, da Silva SR, Zhang L, Meng J, Cui X, Yuan H,

- 546 Sorel O, Zhang SW, Huang Y, Gao SJ. 2018. Viral and cellular  
547 N(6)-methyladenosine and N(6),2'-O-dimethyladenosine  
548 epitranscriptomes in the KSHV life cycle. *Nat Microbiol* 3:108-120.
- 549 37. Gao SJ, Kingsley L, Li M, Zheng W, Parravicini C, Ziegler J, Newton R,  
550 Rinaldo CR, Saah A, Phair J, Detels R, Chang Y, Moore PS. 1996. KSHV  
551 antibodies among Americans, Italians and Ugandans with and without  
552 Kaposi's sarcoma. *Nat Med* 2:925-8.
- 553 38. Patrone G, Puppo F, Cusano R, Scaranari M, Ceccherini I, Puliti A,  
554 Ravazzolo R. 2000. Nuclear run-on assay using biotin labeling, magnetic  
555 bead capture and analysis by fluorescence-based RT-PCR. *Biotechniques*  
556 29:1012-4, 1016-7.
- 557 39. Hao H, Hao S, Chen H, Chen Z, Zhang Y, Wang J, Wang H, Zhang B, Qiu  
558 J, Deng F, Guan W. 2019. N6-methyladenosine modification and METTL3  
559 modulate enterovirus 71 replication. *Nucleic Acids Res* 47:362-374.
- 560

561 **Figure legend**

562 **FIG 1** m<sup>6</sup>A mediates DUSP1 transcript stability during bacterial infection. (A)  
563 Tracks of m<sup>6</sup>A peaks on DUSP1 transcript at 0, 2, 4, and 6 hpi of *P. aeruginosa*.  
564 (B) Expression levels of DUSP1 transcript at 0, 2, 4, and 6 hpi of *P. aeruginosa*  
565 quantified by RNA-seq. (C) m<sup>6</sup>A levels on DUSP1 transcript at 0, 2, 4, and 6  
566 hpi of *P. aeruginosa* examined by MeRIP-qPCR. (D) Expression levels of  
567 DUSP1 transcript at 0, 2, 4, and 6 hpi of *P. aeruginosa* quantified by RT-qPCR.  
568 (E) Examination of DUSP1 and ALKBH5 protein levels following ALKBH5  
569 knockdown in RAW264.7 cells by Western-blotting. (F) m<sup>6</sup>A levels on DUSP1  
570 transcript following ALKBH5 knockdown in RAW264.7 cells examined by  
571 MeRIP-qPCR. (G) Expression levels of DUSP1 transcript following ALKBH5  
572 knockdown in RAW264.7 cells examined by RT-qPCR. (H) Alterations of  
573 half-lives of DUSP1 transcript following ALKBH5 knockdown in RAW264.7  
574 cells during *P. aeruginosa* infection examined by RT-qPCR at the indicated  
575 time points following addition of 10 µg/ml actinomycin D.

576

577 **FIG2** YTHDF2 mediates m<sup>6</sup>A-dependent DUSP1 transcript stability during  
578 bacterial and viral infections. (A) Protein levels of m<sup>6</sup>A writers METTL3,  
579 METTL14 and WTAP, erasers ALKBH5 and FTO, and readers YTHDF1 and  
580 YTHDF2 with or without infection by *C. diphtheriae*, *P. aeruginosa* or HSV-1 at  
581 the indicated time points examined by Western-blotting. (B) Examination of  
582 DUSP1 and YTHDF2 protein levels following YTHDF2 knockdown in

583 RAW264.7 cells by Western-blotting. (C) Expression levels of DUSP1  
584 transcript following YTHDF2 knockdown in RAW264.7 cells examined by  
585 RT-qPCR. (D) Alterations of half-lives of DUSP1 transcript following YTHDF2  
586 knockdown in RAW264.7 cells during *P. aeruginosa* infection examined by  
587 RT-qPCR at the indicated time points following addition of 10 µg/ml  
588 actinomycin D. (E) Binding of YTHDF2 to DUSP1 transcript at the indicated  
589 time points following *P. aeruginosa* infection examined by RIP-qPCR.

590

591 **FIG 3** DUSP1 regulates p38 and JNK phosphorylation and expression of  
592 innate immune response genes during bacterial and viral infections. (A)  
593 DUSP1 knockdown enhanced the p38 and JNK phosphorylation during  
594 infection of *P. aeruginosa*, *C. diphtheriae*, or HSV-1 or HSV-1 ICP34.5 mutant  
595 virus. (B) DUSP1 knockdown enhanced the expression of IL1β, CSF3, TGM2  
596 and SRC genes during infection of *P. aeruginosa*, *C. diphtheriae*, or HSV-1 or  
597 HSV-1 ICP34.5 mutant virus. (C) DUSP1 knockdown enhanced the protein  
598 level of IL1β during infection of *P. aeruginosa*, *C. diphtheriae* or HSV-1 ICP34.5  
599 mutant virus.

600

601 **FIG 4** ALKBH5 regulates p38 and JNK phosphorylation and transcription of  
602 innate immune response genes during bacterial and viral infections. (A-D)  
603 ALKBH5 knockdown enhanced the p38 and JNK phosphorylation during  
604 infection of *C. diphtheriae* (A), *P. aeruginosa* (B), or HSV-1 (C) or HSV-1

605 ICP34.5 mutant virus (D). (E) *De novo* transcription of IL1 $\beta$ , CSF3, TGM2 and  
606 SRC genes following ALKBH5 knockdown at 2 hpi of *P. aeruginosa* examined  
607 by nuclear run-on assay. Cells treated with 4-thiouridine for 1 h after ALKBH5  
608 knockdown were infected *P. aeruginosa* for 4 h and collected for nuclear  
609 run-on assay.

610

611 **FIG 5** ALKBH5 regulates the expression of innate immune response genes  
612 during bacterial and viral infections. (A) ALKBH5 knockdown enhanced the  
613 expression levels of IL1 $\beta$ , CSF3, TGM2 and SRC transcripts during *P.*  
614 *aeruginosa*, *C. diphtheriae*, or HSV-1 or HSV-1 ICP34.5 mutant virus infection.  
615 (B-D) ALKBH5 knockdown enhanced the protein level of IL1 $\beta$  during infection  
616 by *C. diphtheriae* (B), *P. aeruginosa* (C), or HSV-1 ICP34.5 mutant virus (D). (E)  
617 ALKBH5 overexpression inhibited the expression of IL1 $\beta$ , CSF3, TGM2 and  
618 SRC genes during *P. aeruginosa* infection measured by RT-qPCR. (F)  
619 ALKBH5 overexpression inhibited the protein level of IL1 $\beta$  during *P.*  
620 *aeruginosa* infection measured by Western-blotting.

621

622 **FIG 6** A working model of regulation of DUSP1, MAPKs and innate immune  
623 response genes by m<sup>6</sup>A and m<sup>6</sup>A-related proteins YTHDF2 and ALKBH5  
624 during pathogenic infections.

625

626 **SUPPLEMENTAL MATERIAL**

627 **FIG S1** Expression of CSF3, IL1 $\beta$ , TGM2 and SRC transcripts following  
628 infection with different doses of *C. diphtheriae*, *P. aeruginosa* or HSV-1 at the  
629 indicated time points examined by RT-qPCR.

630

631 **FIG S2** Protein level of IL1 $\beta$  precursor following knockdown of DUSP1 (A) or  
632 ALKBH5 (B) at different time points following HSV-1 infection.

633

634 **FIG S3** ALKBH5 knockdown inhibits HSV-1 replication. RAW264.7 cells  
635 transfected with ALKBH5 shRNAs or a scrambled control (NC) were infected  
636 with 1 MOI of HSV-1 for 48 h, and the supernatants were collected for plaque  
637 assay to determine the viral titers.



**Figure 1**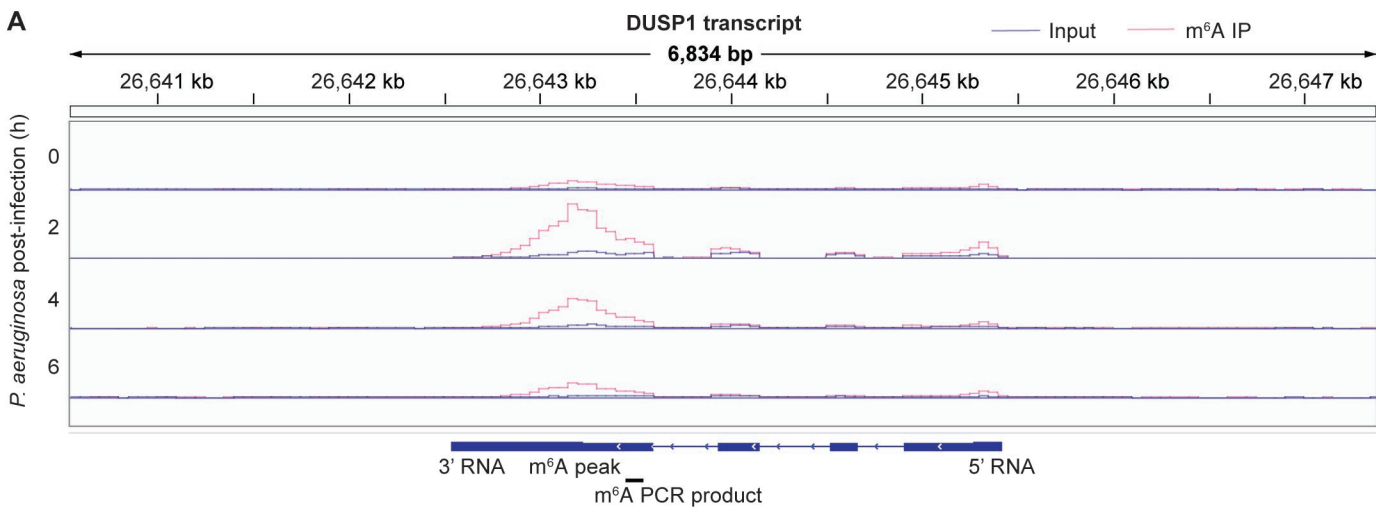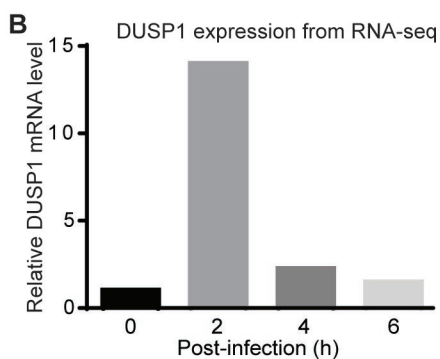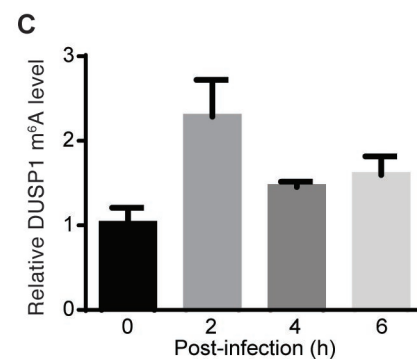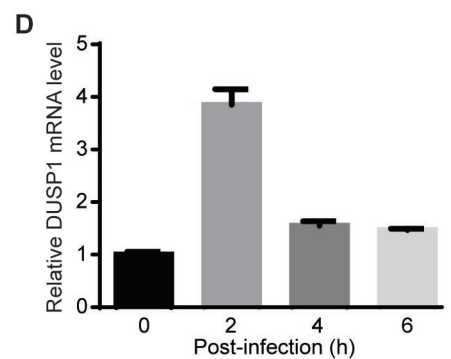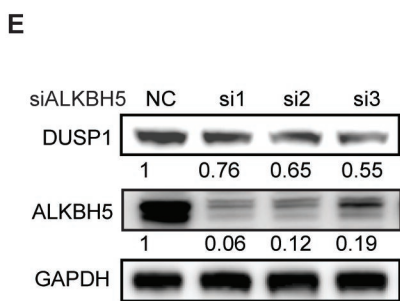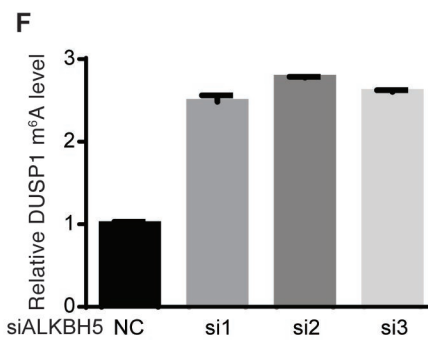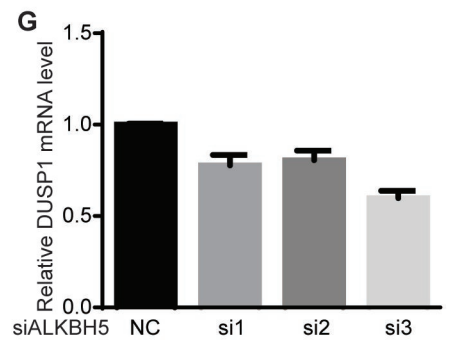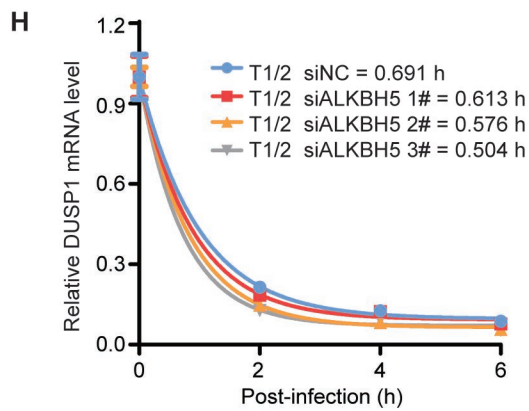

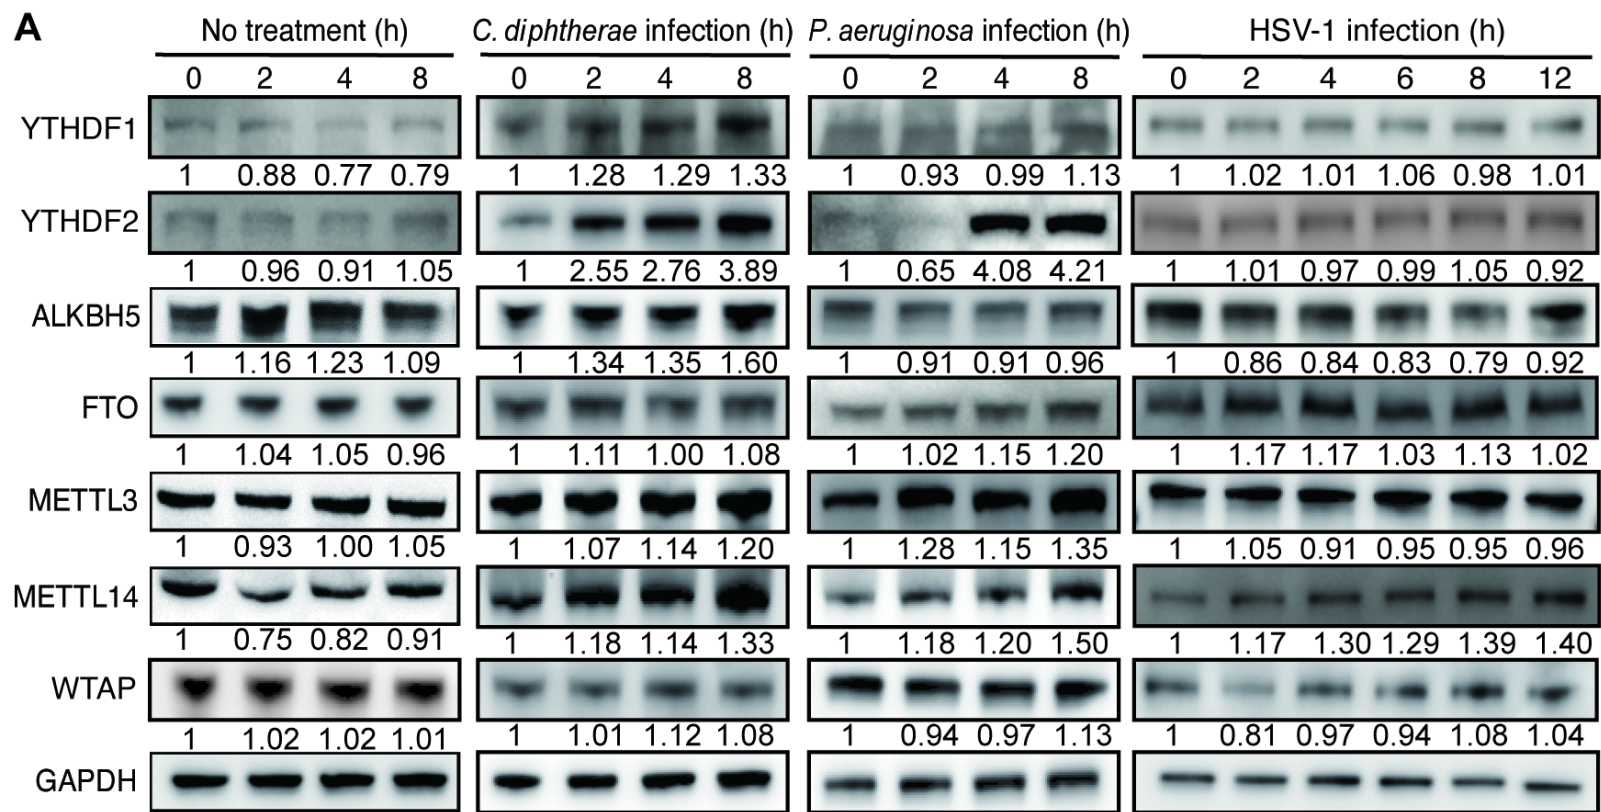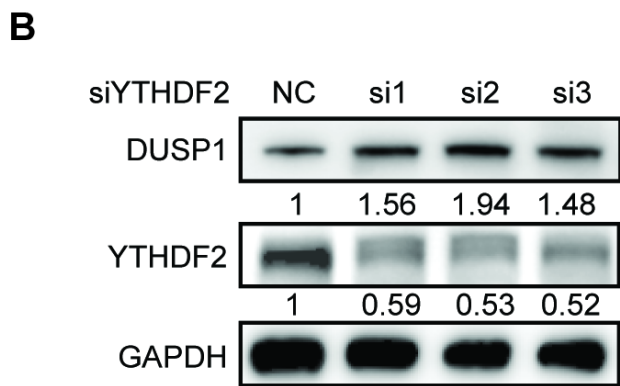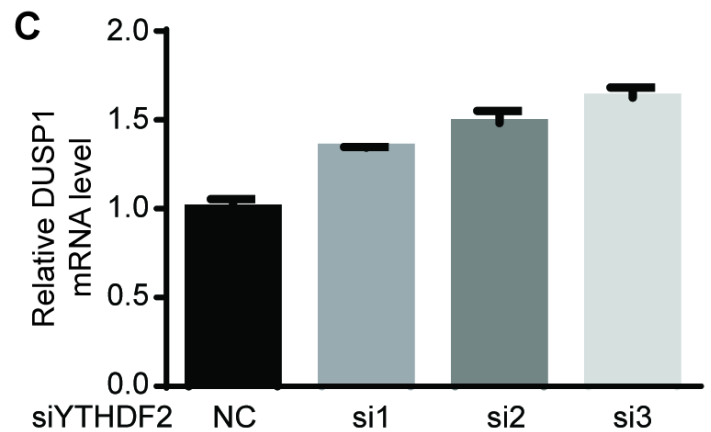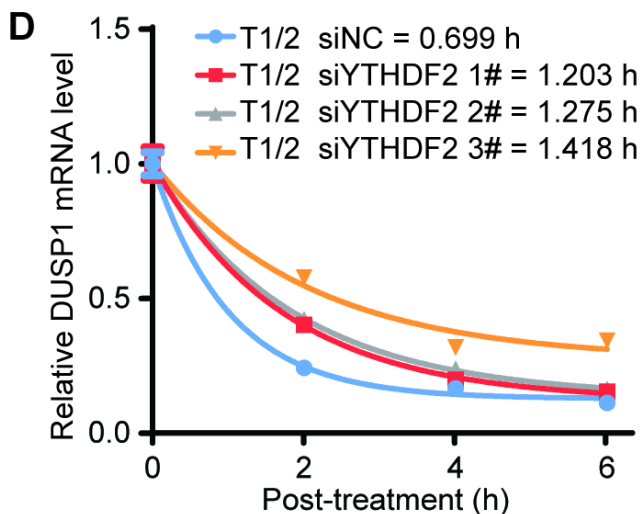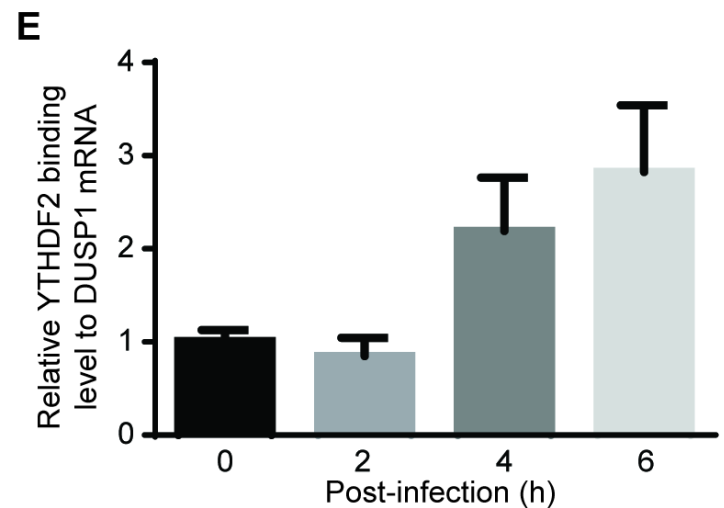





## Figure 4

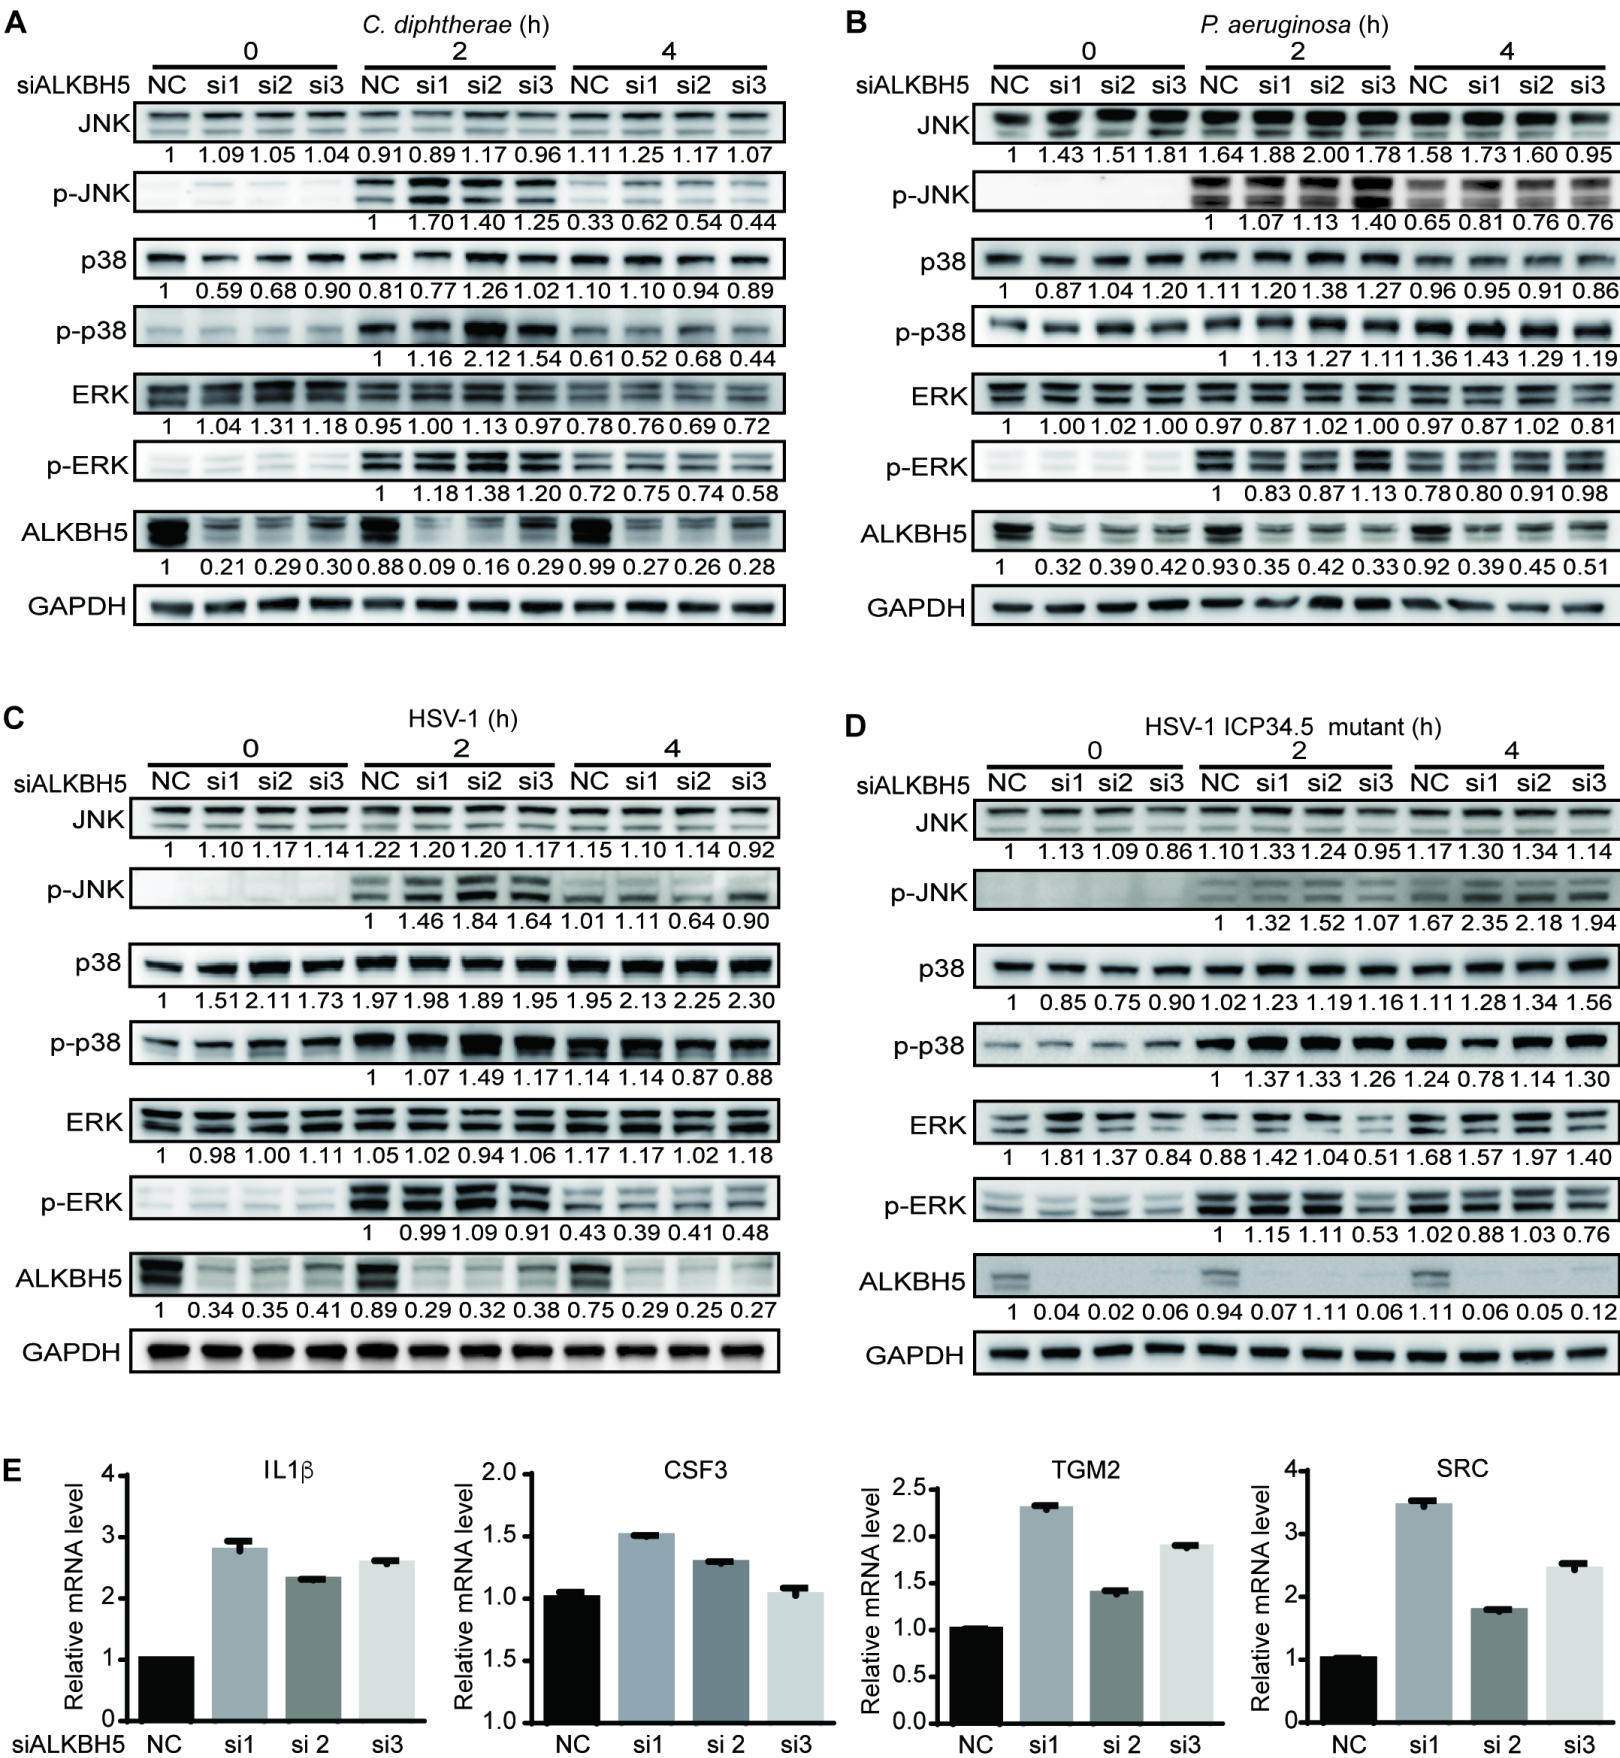

**Figure 5**

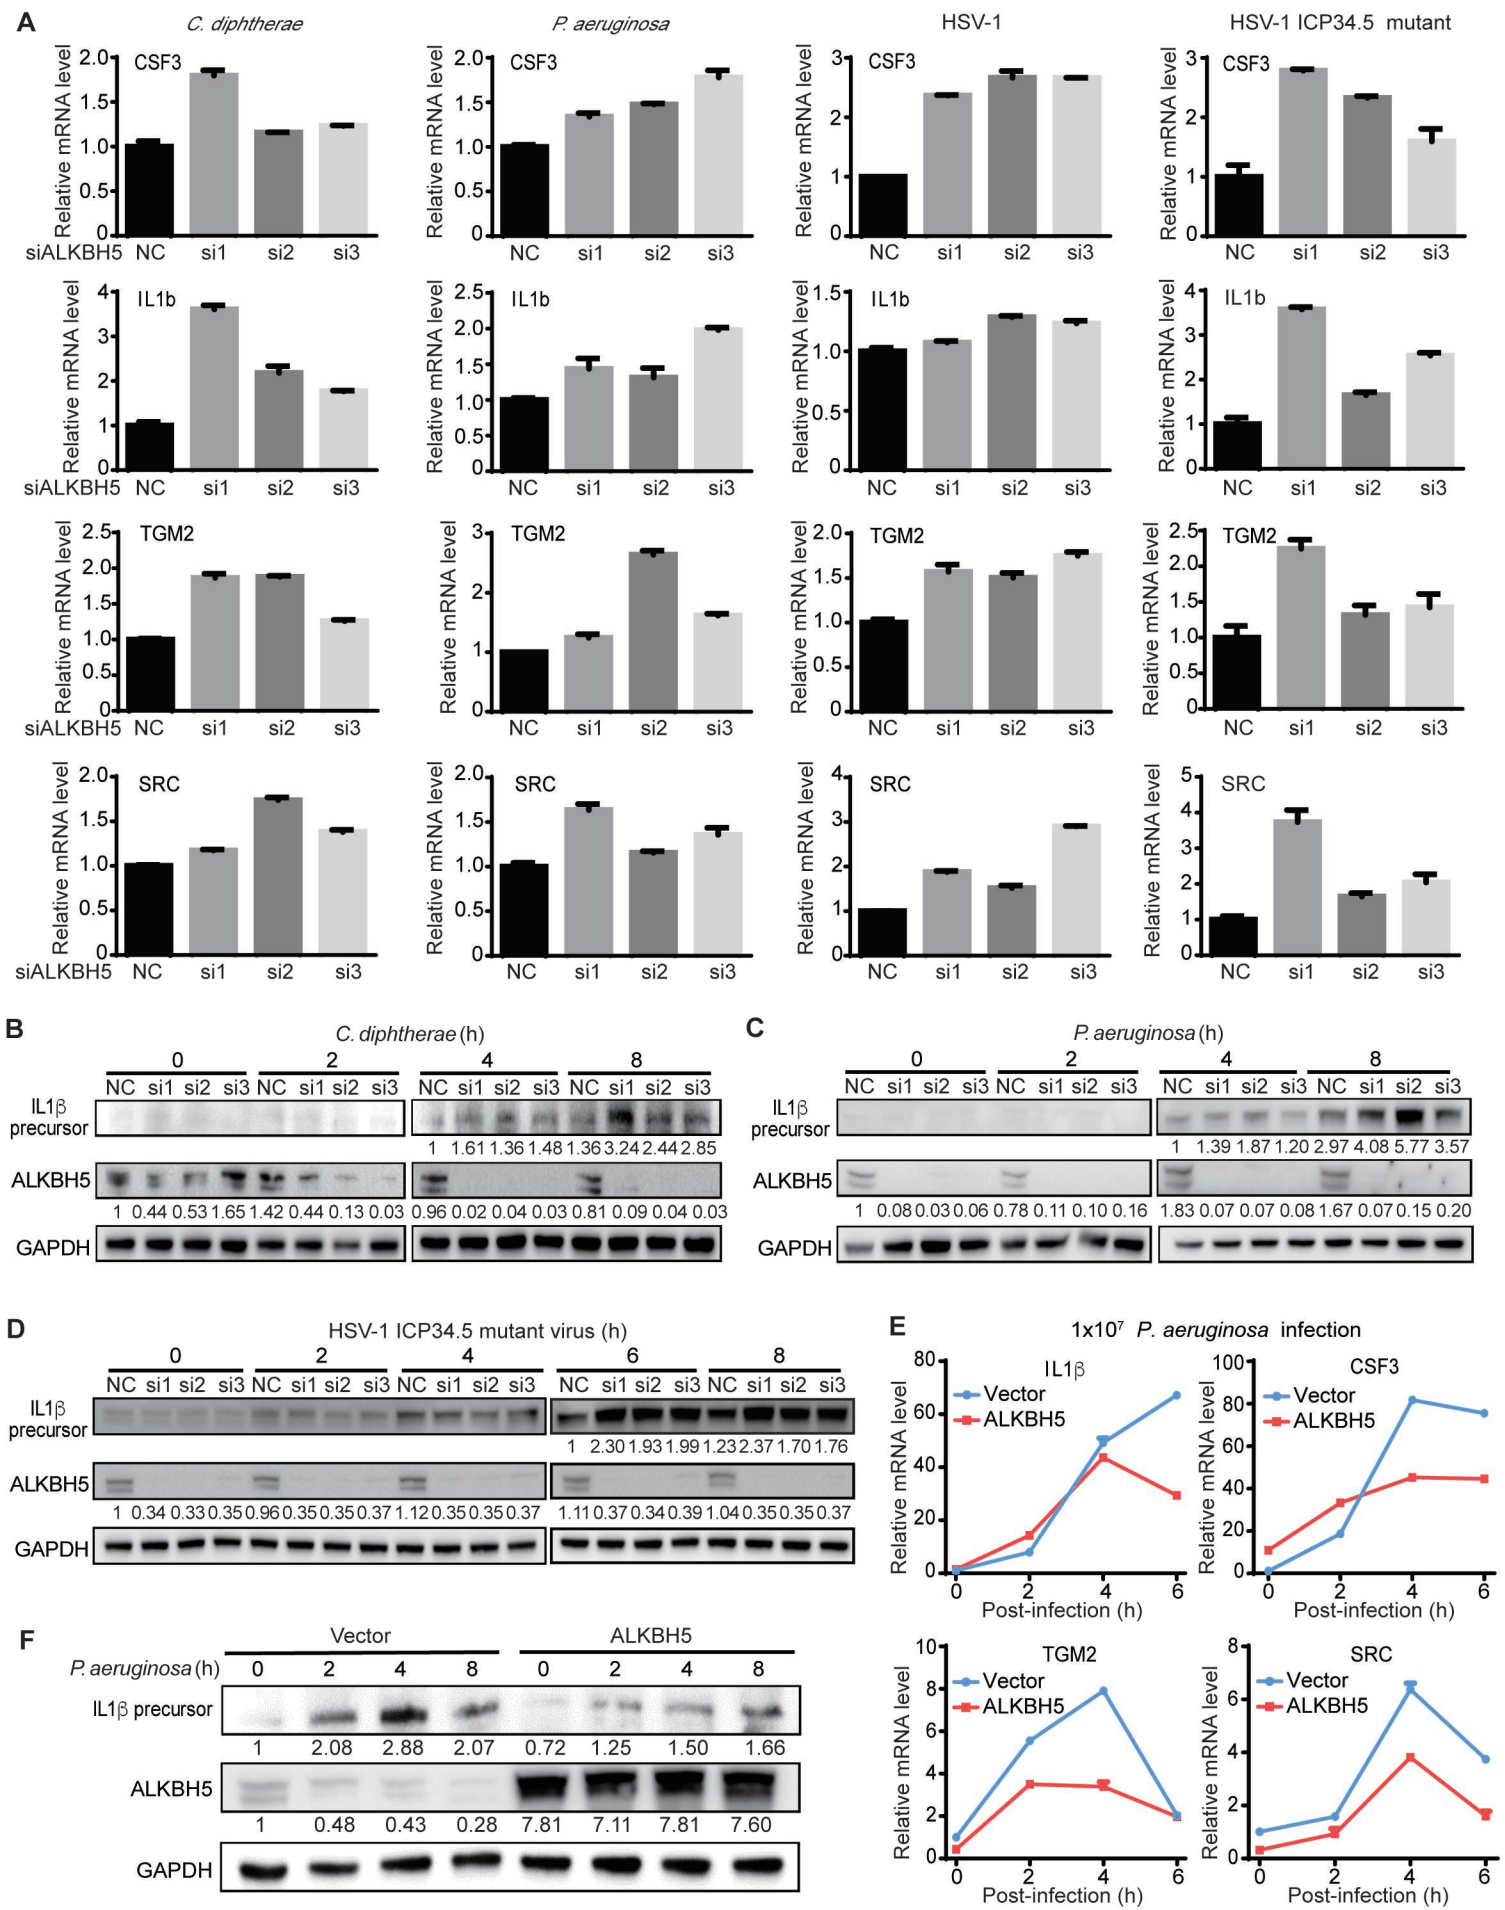

Figure 6

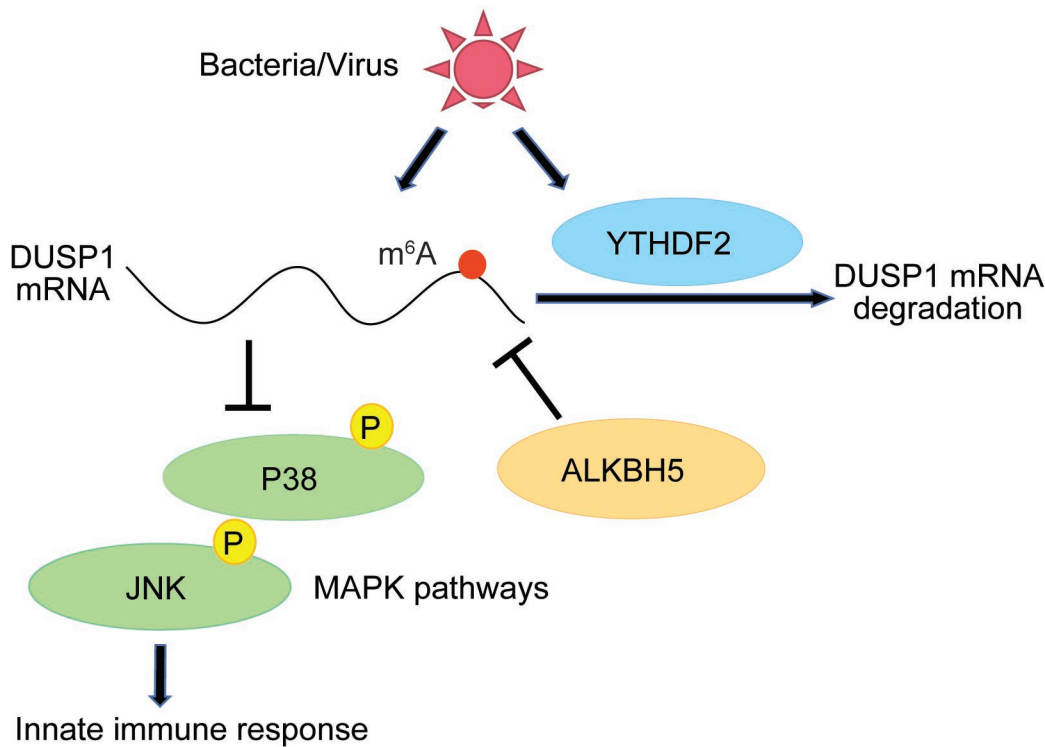

Source: https://www.biorxiv.org/content/10.1101/2022.12.01.518805v1.full.pdf
